# Supplementary material for: A Novel Insight into Screening for Antioxidant Peptides from Hazelnut Protein: Based on the Properties of Amino Acid Residues
Source: MDPI journal article supplement (doi:10.3390/antiox11010127), 2022-01-06
Supplement: s1 [file s1]

Supplementary data:

Table S1. Bio-peptides collected from BIOPEP database and other publications

| ID no.                            | Peptide sequence | GRAVY | Mw      | Ref. |
|-----------------------------------|------------------|-------|---------|------|
| <b>Oxidation of linoleic acid</b> |                  |       |         |      |
| 3296                              | HHP              | -2.67 | 389.40  | [1]  |
| 3297                              | YHH              | -2.57 | 455.45  |      |
| 3298                              | HHPL             | -1.05 | 502.56  |      |
| 3299                              | LHPH             | -1.05 | 502.56  |      |
| 3300                              | PHH              | -2.67 | 389.40  |      |
| 3301                              | HLH              | -0.87 | 405.44  |      |
| 3302                              | LHH              | -0.87 | 405.44  |      |
| 3303                              | HPLH             | -1.05 | 502.56  |      |
| 3304                              | LLPHHH           | -0.60 | 752.86  |      |
| 3305                              | LH               | 0.30  | 268.30  |      |
| 3306                              | HPhL             | -1.05 | 502.56  |      |
| 3307                              | PYY              | -1.40 | 441.46  |      |
| 3308                              | HHLP             | -1.05 | 502.56  |      |
| 3309                              | LPYY             | -0.10 | 554.62  |      |
| 3310                              | LYPY             | -0.10 | 554.62  |      |
| 3311                              | HPH              | -2.67 | 389.40  |      |
| 3312                              | LLHH             | 0.30  | 518.60  |      |
| 3313                              | PLHH             | -1.05 | 502.56  |      |
| 3314                              | LLPH             | 0.70  | 478.58  |      |
| 3315                              | HLHP             | -1.05 | 502.56  |      |
| 3316                              | HLPH             | -1.05 | 502.56  |      |
| 3317                              | HL               | 0.30  | 268.30  |      |
| 3318                              | LPHH             | -1.05 | 502.56  | [2]  |
| 3319                              | HH               | -3.20 | 292.28  |      |
| 3320                              | HHPLL            | -0.08 | 615.72  |      |
| 3809                              | LQSGDALRVPSGTTY  | -0.37 | 1727.8  |      |
| 3810                              | MQFHT            | -0.54 | 662.75  |      |
| 3811                              | PHCKRM           | -1.47 | 787.82  | [3]  |
| 3826                              | LVNPHDHQN        | -1.56 | 1073.1  |      |
| 7867                              | GY               | -1.00 | 401.39  |      |
| 7945                              | YY               | -1.30 | 507.51  | [4]  |
| 7946                              | YYG              | -1.00 | 401.39  |      |
| 7967                              | YGY              | -1.00 | 401.39  | [5]  |
| 8253                              | LEELEELEGCE      | -0.92 | 1438.30 |      |
| 8282                              | ISELGW           | 0.45  | 703.78  | [6]  |
| 8433                              | FLKPLFNAALKLLP   | 0.98  | 1585.00 | [7]  |
| 8439                              | YLMSR            | -0.18 | 668.80  | [8]  |
| 8440                              | VLYEE            | -0.06 | 651.70  |      |
| 8441                              | MILMR            | 1.52  | 662.90  |      |

|                                                                |                       |       |         |      |
|----------------------------------------------------------------|-----------------------|-------|---------|------|
| 8950                                                           | WCTSVS                | 0.58  | 698.61  | [9]  |
| 8955                                                           | PYSFK                 | -0.96 | 640.72  | [10] |
| 8956                                                           | GFGPGL                | 0.63  | 546.61  |      |
| 8957                                                           | VGGRP                 | -0.54 | 484.54  |      |
| 9370                                                           | VKRRGQDCIHGFCSD       | -0.78 | 1754.66 | [11] |
| 9371                                                           | GQFNDKRWIPFG          | -1.01 | 1464.63 |      |
| 9372                                                           | APIRMWYMYRKLTDMEPKPVA | -0.52 | 2597.14 |      |
| 9450                                                           | LTEQESGVPVMK          | -0.32 | 1317.52 | [12] |
| <b>Thiobarbituric acid reactive substances</b>                 |                       |       |         |      |
| 8463                                                           | VPKNYFHDIV            | -0.13 | 1231.40 | [13] |
| 8464                                                           | LVMFLDNQHRVIRH        | -0.05 | 1778.11 |      |
| 8465                                                           | FVNQPYLLYSVHMK        | 0.11  | 1739.05 |      |
| 9130                                                           | VAWRNRCKGTD           | -1.22 | 1322.33 | [14] |
| 9131                                                           | WRNRCKGTD             | -2.16 | 1152.11 |      |
| 9132                                                           | AWIRGCRL              | 0.29  | 991.04  |      |
| 9133                                                           | WIRGCRL               | 0.07  | 919.96  |      |
| 9134                                                           | IRGCRL                | 0.23  | 733.75  |      |
| <b>Oxidation in liposomes</b>                                  |                       |       |         |      |
| 8480                                                           | YPELF                 | 0.04  | 667.74  | [15] |
| <b><math>\beta</math>-carotene - linoleate bleaching (BCB)</b> |                       |       |         |      |
| 9381                                                           | LTTLDSE               | -0.23 | 777.82  | [16] |
| 9382                                                           | VVGGDGDV              | 0.55  | 716.73  |      |
| <b>Oxidation of the liver</b>                                  |                       |       |         |      |
| 945                                                            | CERPTCCEHS            | -1.03 | 1214.86 | [17] |
| <b>Oxidation of linoleic acid</b>                              |                       |       |         |      |
|                                                                | AVPYPQR               | -0.93 | 829.94  | [18] |
|                                                                | WPP                   | -1.37 | 398.46  | [19] |
|                                                                | LW                    | 1.45  | 317.38  | [20] |
|                                                                | FD                    | -0.35 | 280.27  |      |
|                                                                | WL                    | 1.45  | 317.38  |      |
|                                                                | WV                    | 1.65  | 303.36  |      |
|                                                                | YLGAK                 | 0.00  | 550.65  | [21] |
|                                                                | GFR                   | -0.70 | 378.43  | [22] |
|                                                                | GPCSR                 | -0.96 | 518.59  |      |
|                                                                | CFCTKPC               | 0.59  | 801.01  |      |
|                                                                | MCESASSK              | -0.45 | 841.94  |      |
|                                                                | RGY                   | -2.07 | 394.43  | [23] |
|                                                                | WIR                   | -0.30 | 473.58  |      |
|                                                                | VAW                   | 1.70  | 374.44  |      |

---

|                |       |         |      |
|----------------|-------|---------|------|
| YGS            | -0.83 | 325.32  | [24] |
| WYGPD          | -1.54 | 636.66  | [25] |
| KLSDW          | -1.06 | 647.72  |      |
| WEGPK          | -2.06 | 615.69  | [26] |
| LTEQESGVPVMK   | -0.32 | 1317.51 | [12] |
| YP             | -1.45 | 278.30  | [27] |
| YPPAK          | -1.32 | 574.67  | [28] |
| LNLPTAVYMT     | 1.08  | 1221.46 | [29] |
| HLFGPPGKKDPV   | -0.78 | 1291.50 | [30] |
| KHNRGDEF       | -2.46 | 1002.05 | [31] |
| NADFGLNGLGLELA | 0.20  | 1290.37 | [32] |
| NGLEGLK        | -0.59 | 729.82  |      |
| LPHSGY         | -0.58 | 672.73  | [33] |

---

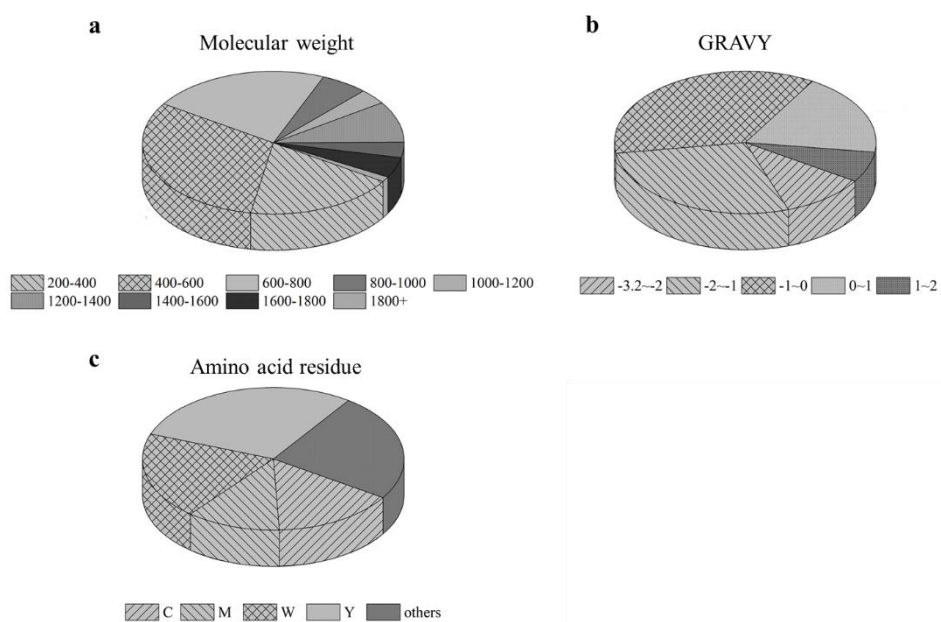

Figure S1. Analysis of the bio-peptides harvested from BIOPEP database and other publications

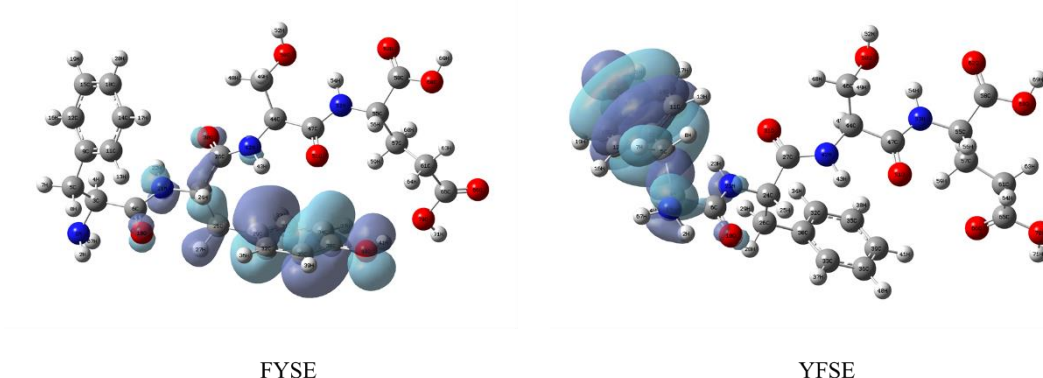

Figure S2. The highest occupied molecular orbital (HOMO) of FYSE and YFSE

### Reference

- Chen, H.; Muramoto, K.; Yamauchi, F.; Nokihara, K. Antioxidant Activity of Designed Peptides Based on the Antioxidative Peptide Isolated from Digests of a Soybean Protein. *J. Agric. Food. Chem.* **1996**, *44*, 2619-2623.
- Pihlanto, A. Antioxidative peptides derived from milk proteins. *Int. Dairy J.* **2006**, *16*, 1306-1314.
- Yokomizo, A.; Takenaka, Y.; Takenaka, T. Antioxidative Activity of Peptides Prepared from Okara Protein. *Food Sci. Technol. Res.* **2002**, *8*, 357-359.
- Saito, K.; Jin, D.H.; Ogawa, T.; Muramoto, K.; Hatakeyama, E.; Yasuhara, T.; Nokihara, K. Antioxidative Properties of Tripeptide Libraries Prepared by the Combinatorial Chemistry. *J. Agric. Food. Chem.* **2003**, *51*, 3668-3674.
- Qian, Z.J.; Jung, W.K.; Kim, S.K. Free radical scavenging activity of a novel antioxidative peptide purified from hydrolysate of bullfrog skin, *Rana catesbeiana* Shaw. *Bioresour. Technol.* **2008**, *99*, 1690-1698.
- Tsopmo, A.; Romanowski, A.; Banda, L.; Lavoie, J.C.; Jenssen, H.; Friel, J.K. Novel anti-oxidative peptides from enzymatic digestion of human milk. *Food Chem.* **2011**, *126*, p.1138-1143.
- Mojallal-Tabatabaei, Z.; Asoodeh, A.; Asadi, F.; Nezafati, H.R. ACE-Inhibitory and Antioxidant Activity of Temporin-Ra Peptide: Biochemical Characterization and Molecular Modeling Study. 2014; pp. 493-500.
- Chi, C.; Hu, F.; Wang, B.; Ren, X.; Deng, S.; Wu, C. Purification and characterization of three antioxidant peptides from protein hydrolyzate of croceine croaker (*Pseudosciaena crocea*) muscle. *Food Chem.* **2015**, *168*, 662-667.
- Sudhakar, S.; Nazeer, R.A. Structural characterization of an Indian squid antioxidant peptide and its protective effect against cellular reactive oxygen species. *J. Funct. Foods* **2015**, *14*, 502-512.
- Cai, L.; Wu, X.; Zhang, Y.; Li, X.; Ma, S. Purification and characterization of three antioxidant peptides from protein hydrolysate of grass carp (*Ctenopharyngodon idella*) skin. *J. Funct. Foods* **2015**.
- Yu, H.; Qiao, X.; Gao, J.; Wang, C.; Cai, S.; Feng, L.; Wang, H.; Wang, Y.p. Identification and Characterization of Novel Antioxidant Peptides Involved in Redox Homeostasis of Frog, *Limnonectes fragilis*. *Protein Pept Lett.* **2015**, *22*, 776-784.
- Hamid; Tanzadehpanah; Ahmad; Asoodeh; Jamshidkhan; Chamani. An antioxidant peptide derived from Ostrich (*Struthio camelus*) egg white protein hydrolysates. *Food Res. Int.* **2012**.
- Najafian, L.; Babji, A.S. Isolation, purification and identification of three novel antioxidative peptides from patin (*Pangasius sutchi*) myofibrillar protein hydrolysates. *LWT - Food Sci. Technol.* **2015**, *60*, 452-461.

14. Carrillo, W.; Gomezruiz, J.A.; Miralles, B.; Ramos, M.; Barrio, D.A.; Recio, I. Identification of antioxidant peptides of hen egg-white lysozyme and evaluation of inhibition of lipid peroxidation and cytotoxicity in the Zebrafish model. *Eur. Food Res. Technol.* **2016**, *242*, 1777-1785.
15. Gobba, C.D.; Tompa, G.; Otte, J. Bioactive peptides from caseins released by cold active proteolytic enzymes from *Arsukibacterium ikkense*. *Food Chem.* **2014**, *165*, 205-215.
16. Chang, S.K.; Ismail, A.; Yanagita, T.; Mohd Esa, N.; Baharuldin, M.T.H. Antioxidant peptides purified and identified from the oil palm (*Elaeis guineensis* Jacq.) kernel protein hydrolysate. *J. Funct. Foods* **2015**, *14*, 63-75.
17. Zeng, W.C.; Zhang, W.H.; He, Q.; Shi, B. Purification and characterization of a novel antioxidant peptide from bovine hair hydrolysates. *Process Biochem.* **2015**, *50*, 948-954.
18. Rival, S.G.; Boeriu, C.G.; Wichers, H.J. Caseins and Casein Hydrolysates. 2. Antioxidative Properties and Relevance to Lipoxxygenase Inhibition. *J. Agric. Food. Chem.* **2001**, *49*, 295-302.
19. Chi, C.; Hu, F.; Wang, B.; Li, T.; Ding, G. Antioxidant and anticancer peptides from the protein hydrolysate of blood clam (*Tegillarca granosa*) muscle. *J. Funct. Foods* **2015**, *15*, 301-313.
20. Guo, H.; Kouzuma, Y.; Yonekura, M. Structures and properties of antioxidative peptides derived from royal jelly protein. *Food Chem.* **2009**, *113*, 238-245.
21. Chen, C.; Chi, Y.J.; Zhao, M.Y.; Lv, L. Purification and identification of antioxidant peptides from egg white protein hydrolysate. *Amino Acids* **2012**, *43*, 457-466.
22. Huang, G.; Deng, J.; Chen, H.; Huang, S.; Liao, J.; Hou, W.; Lin, Y. Defensin protein from sweet potato (*Ipomoea batatas* [L.] Lam 'Tainong 57') storage roots exhibits antioxidant activities in vitro and ex vivo. *Food Chem.* **2012**, *135*, 861-867.
23. Rao, S.; Sun, J.; Liu, Y.; Zeng, H.; Su, Y.; Yang, Y. ACE inhibitory peptides and antioxidant peptides derived from in vitro digestion hydrolysate of hen egg white lysozyme. *Food Chem.* **2012**, *135*, 1245-1252.
24. Zheng, L.; Su, G.; Ren, J.; Gu, L.; You, L.; Zhao, M. Isolation and characterization of an oxygen radical absorbance activity peptide from defatted peanut meal hydrolysate and its antioxidant properties. *J. Agric. Food. Chem.* **2012**, *60*, 5431-5437.
25. Dong, Y.; Qi, G.; Yang, Z.; Wang, H.; Wang, S.; Chen, G. Preparation, Separation and Antioxidant Properties of Hydrolysates Derived from *Grifola frondosa* Protein. *Czech Journal of Food Sciences* **2016**, *33*, 500-506.
26. Chi, C.; Wang, B.; Wang, Y.; Zhang, B.; Deng, S. Isolation and characterization of three antioxidant peptides from protein hydrolysate of bluefin leatherjacket (*Navodon septentrionalis*) heads. *J. Funct. Foods* **2015**, *12*, 1-10.
27. Zhang, Y.; Liu, J.; Lu, X.; Zhang, H.; Wang, L.; Guo, X.; Qi, X.; Qian, H. Isolation And Identification Of An Antioxidant Peptide Prepared From Fermented Peanut Meal Using *Bacillus Subtilis* Fermentation. *Int. J. Food Prop.* **2014**, *17*, 1237-1253.
28. Wang, B.; Li, L.; Chi, C.; Ma, J.; Luo, H.; Xu, Y. Purification and characterisation of a novel antioxidant peptide derived from blue mussel (*Mytilus edulis*) protein hydrolysate. *Food Chem.* **2013**, *138*, 1713-1719.
29. Je, J.; Qian, Z.; Lee, S.H.; Byun, H.; Kim, S. Purification and Antioxidant Properties of Bigeye Tuna (*Thunnus obesus*) Dark Muscle Peptide on Free Radical-Mediated Oxidative Systems. *J. Med. Food* **2008**, *11*, 629-637.
30. Duan, X.; Ocen, D.; Wu, F.; Li, M.; Yang, N.; Xu, J.; Chen, H.; Huang, L.; Jin, Z.; Xu, X. Purification and characterization of a natural antioxidant peptide from fertilized eggs. *Food Res. Int.* **2014**, *56*, 18-24.
31. Zhang, J.; Zhang, H.; Wang, L.; Guo, X.; Wang, X.; Yao, H. Antioxidant activities of the rice endosperm protein hydrolysate: identification of the active peptide. *Eur. Food Res. Technol.* **2009**, *229*, 709-719.
32. Mendis, E.; Rajapakse, N.; Byun, H.; Kim, S. Investigation of jumbo squid (*Dosidicus gigas*) skin gelatin peptides for their in vitro antioxidant effects. *Life Sci.* **2005**, *77*, 2166-2178.
33. Je, J.; Park, P.; Kim, S. Antioxidant activity of a peptide isolated from Alaska pollack

(*Theragra chalcogramma*) frame protein hydrolysate. *Food Res. Int.* **2005**, 38, 45-50.
